# Supplementary material for: Childhood Diarrhea Exhibits Spatiotemporal Variation in Northwest Ethiopia: A SaTScan Spatial Statistical Analysis
Source: PLoS One. 2015 Dec 21;10(12):e0144690. doi: 10.1371/journal.pone.0144690 (PMC4687002; doi:10.1371/journal.pone.0144690)
Supplement: S1 File — (XLS) [file pone.0144690.s001.xls]

## Sheet: final line graph
			Smoothing using moving averages to visualize the trend of childhood diarrhea
Time			Rate	Log rate	MA	CMA	St,It	st	Deseasonalize	Trend(Yt= -0.008t + 1.69)
1	2007	Jul to Sep	26.6	1.42488				0.94	1.51583	1.67889	1.68686	-0.00797164
2		Oct to Dece	39.7	1.59879				0.97	1.64824	1.67092	1.68686	-0.00797164
3	2008	Jan to Mar	47.3	1.67486	1.5655	1.58965	1.0536	1.05535	1.58702	1.66295	1.68686	-0.00797164
4		Apr to June	36.6	1.56348	1.6138	1.61672	0.967068	1.02662	1.52293	1.65498	1.68686	-0.00797164
5		Jul to Sep	41.5	1.61805	1.61965	1.62674	0.994656	0.935364	1.72986	1.64701	1.68686	-0.00797164
6		Oct to Dece	41.9	1.62221	1.63383	1.65331	0.981189	0.970322	1.67183	1.63903	1.68686	-0.00797164
7	2009	Jan to Mar	53.9	1.73159	1.6728	1.66729	1.03856	1.06	1.63357	1.63106	1.68686	-0.00797164
8		Apr to June	52.4	1.71933	1.66179	1.68654	1.01944	1.03	1.66925	1.62309	1.68686	-0.00797164
9		Jul to Sep	37.5	1.57403	1.71129	1.71499	0.91781	0.94	1.6745	1.61512	1.68686	-0.00797164
10		Oct to Dece	66.1	1.8202	1.71868	1.71837	1.05926	0.97	1.8765	1.60715	1.68686	-0.00797164
11	2010	Jan to Mar	57.7	1.76118	1.71806	1.71013	1.02985	1.06	1.66149	1.59918	1.68686	-0.00797164
12		Apr to June	52.1	1.71684	1.70219	1.66348	1.03207	1.03	1.66683	1.5912	1.68686	-0.00797164
13		Jul to Sep	32.4	1.51055	1.62478	1.60596	0.940586	0.94	1.60696	1.58323	1.68686	-0.00797164
14		Oct to Dece	32.4	1.51055	1.58715	1.57919	0.956529	0.97	1.55726	1.57526	1.68686	-0.00797164
15	2011	Jan to Mar	40.8	1.61066	1.57124	1.55495	1.03583	1.06	1.51949	1.56729	1.68686	-0.00797164
16		Apr to June	45	1.65321	1.53866	1.53245	1.0788	1.03	1.60506	1.55932	1.68686	-0.00797164
17		Jul to Sep	24	1.38021	1.52625	1.53369	0.899926	0.94	1.46831	1.55135	1.68686	-0.00797164
18		Oct to Dece	28.9	1.4609	1.54114	1.53622	0.950969	0.97	1.50608	1.54337	1.68686	-0.00797164
19	2012	Jan to Mar	46.8	1.67025	1.5313	1.52804	1.09307	1.06	1.5757	1.5354	1.68686	-0.00797164
20		Apr to June	41.1	1.61384	1.52477	1.52496	1.05828	1.03	1.56684	1.52743	1.68686	-0.00797164
21		Jul to Sep	22.6	1.35411	1.52515	1.51497	0.893818	0.94	1.44054	1.51946	1.68686	-0.00797164
22		Oct to Dece	29	1.4624	1.50479	1.4853	0.984581	0.97	1.50763	1.51149	1.68686	-0.00797164
23	2013	Jan to Mar	38.8	1.58883	1.46581	1.46952	1.08119	1.06	1.4989	1.50352	1.68686	-0.00797164
24		Apr to June	28.7	1.45788	1.47323	1.45196	1.00408	1.03	1.41542	1.49554	1.68686	-0.00797164
25		Jul to Sep	24.2	1.38382	1.4307	1.43342	0.965391	0.94	1.47214	1.48757	1.68686	-0.00797164
26		Oct to Dece	19.6	1.29226	1.43615	1.45294	0.889408	0.97	1.33222	1.4796	1.68686	-0.00797164
27	2014	Jan to Mar	40.8	1.61066	1.46973			1.06	1.51949	1.47163	1.68686	-0.00797164
28		Apr to June	39.1	1.59218				1.03	1.5458	1.46366	1.68686	-0.00797164
					SUMMARY OUTPUT
					Regression Statistics
					Multiple R	0.599938
					R Square	0.359926
					Adjusted R Square	0.335307
					Standard Error	0.0891126
					Observations	28
					ANOVA
						df	SS	MS	F	Significance F
					Regression	1	0.116101	0.116101	14.6203	0.000739276
					Residual	26	0.206468	0.00794106
					Total	27	0.322568
						Coefficients	Standard Error	t Stat	P-value	Lower 95%	Upper 95%	Lower 95.0%	Upper 95.0%
					Intercept	1.68686	0.0346044	48.7472	4.35517e-27	1.61573	1.75799	1.61573	1.75799
					t	-0.00797164	0.00208483	-3.82365	0.000739276	-0.0122571	-0.00368622	-0.0122571	-0.00368622
First Incidenci rate of childhood diarrhea was change to log childhood diarrhea rate to fullfil the assumption of normal distribution for prediction of linear regression model
Descriptions
MA refers moving average of four quarters/seasons(eg. the first value of MA is calculated using four quarters/seasons which is actual value between 2 and 3 cell, it is similar for the rest cells)
CMA refers moving average of the respective cell (eg. the first value of CMA is calculated using the first and second value of MA)
st It refers seasonal and random component (it is calculated by using log rate/CMA)
St refers seasonal component only (the average of st It of each similar season to remove the random component)
It referes random component
Deseasonalize refers the value of CDD by removing the seasonal and random component (log rate/st)
Trend refers it is calculated using linear regression analysis (Yt(Deasonalize value)=at +b, a=slope, b= intercept, t= time)
